1 **Tree growth enhancement drives a persistent biomass gain in unmanaged**  
2 **temperate forests**

3 Laura Marqués<sup>1,2,3,4</sup>, Ensheng Weng<sup>5</sup>, Harald Bugmann<sup>6</sup>, David I. Forrester<sup>2,7</sup>, Brigitte  
4 Rohner<sup>2</sup>, Martina L. Hobi<sup>2</sup>, Volodymyr Trotsiuk<sup>2</sup> and Benjamin D. Stocker<sup>1,2,3,4</sup>

5 **Institutional affiliations:**

6 <sup>1</sup>Department for Environmental Systems Science, Institute of Agricultural Sciences, ETH  
7 Zürich, Switzerland.

8 <sup>2</sup>Swiss Federal Institute for Forest, Snow and Landscape Research WSL, Birmensdorf,  
9 Switzerland.

10 <sup>3</sup>Institute of Geography, University of Bern, Hallerstrasse 12, 3012 Bern, Switzerland.

11 <sup>4</sup>Oeschger Centre for Climate Change Research, University of Bern, Falkenplatz 16, 3012  
12 Bern, Switzerland.

13 <sup>5</sup>Center for Climate Systems Research, Columbia University and NASA Goddard Institute for  
14 Space Studies, New York, United States of America.

15 <sup>6</sup>Department of Environmental Systems Science, Forest Ecology, Institute of Terrestrial  
16 Ecosystems, ETH Zürich, Switzerland.

17 <sup>7</sup>CSIRO Land and Water, GPO Box 1700, ACT 2601, Australia.

18 Contact Information:

19 Corresponding author details: [laura.marques@usys.ethz.ch](mailto:laura.marques@usys.ethz.ch); [+41 44 632 85 13](tel:+41446328513).

## 20 **Abstract**

21           While enhanced tree growth over the last decades has been reported in forests across  
22 the globe, it remains unclear whether it drives persistent biomass increases of the stands,  
23 particularly in mature forests. Enhanced tree growth and stand-level biomass are often linked  
24 with a simultaneous increase in density-driven mortality and a reduction in tree longevity.  
25 Identifying empirical evidence regarding the balance between these processes is challenging  
26 due to the confounding effects of stand history, management, and environmental changes.  
27 Here, we investigate the link between growth and biomass via the shift in the negative  
28 relationship between average tree size and stand density (tree number). We find increasing  
29 stand density for a given tree size in unmanaged closed-canopy forests in Switzerland over the  
30 past six decades and a positive relationship between growth and stand density - qualitatively  
31 consistent with simulations by a mechanistic, cohort-resolving ecosystem model (LM3-PPA).  
32 Model simulations show that, in the absence of other disturbances, enhanced growth  
33 persistently increases biomass stocks despite simultaneous decreases in carbon residence time  
34 and tree longevity, independent of assumptions about the drivers of tree mortality. However,  
35 the magnitude of simulated changes critically depends on the shape of the mortality  
36 parameterizations. Our analyses reconcile reports of growth-induced reductions of tree  
37 longevity with model predictions of persistent biomass increases, and with our finding of a  
38 trend towards denser forests in response to growth - also in mature stands.

## 39 **Keywords**

40 Biomass stocks, growth enhancement, growth-lifespan trade-offs, tree mortality, self-thinning,  
41 vegetation models.

## 42 1. Introduction

43 Vegetation demography processes, namely growth, recruitment, and mortality are being  
44 altered by global environmental change (McDowell *et al.* 2020). Enhanced tree growth over  
45 the last decades has been widely reported (Cole *et al.* 2009; McMahan *et al.* 2010; Fang *et al.*  
46 2014; Wu *et al.* 2014; Brienen *et al.* 2015). Trends in growth and forest functioning have been  
47 attributed to increased nutrient inputs by atmospheric deposition, rising temperatures and  
48 extended growing seasons (Pretzsch *et al.* 2014; Anderegg *et al.* 2015), and elevated  
49 atmospheric carbon dioxide (eCO<sub>2</sub>) (Huang *et al.* 2007; Lewis *et al.* 2009; Phillips *et al.* 2009;  
50 Pan *et al.* 2011; Hubau *et al.* 2020). Also, biomass stocks have been reported to have increased  
51 in forests around the globe (Pan *et al.* 2011), unless large-scale disturbances and extreme events  
52 reversed long-term trends (Wang *et al.* 2021). However, it remains debated to what extent  
53 increased biomass stocks are a consequence of accelerated tree growth in response to  
54 environmental change or of recovery from past disturbances and land use (Frelich 2002; Gloor  
55 *et al.* 2009). Disturbance history and stand age are dominant factors determining forest biomass  
56 stocks (Bradford *et al.* 2008) and can mask the effects of environmental change. This limits  
57 our understanding and poses an observational challenge for attributing the observed forest  
58 carbon (C) sink (Pan *et al.* 2011) to anthropogenic versus environmental drivers, and for  
59 answering the question of whether accelerated tree growth, induced by environmental change,  
60 leads to persistent increases in forest biomass stocks.

61 Direct evidence for environmental change effects on growth and biomass comes from  
62 ecosystem manipulation experiments. Free Air CO<sub>2</sub> Enrichment (FACE) experiments have  
63 identified increases in biomass production in response to enhanced CO<sub>2</sub> (Ainsworth & Long  
64 2005; Norby *et al.* 2005; Hovenden *et al.* 2019; Jiang *et al.* 2020; Walker *et al.* 2021). However,  
65 positive effects on biomass have been argued to be transitory (Bugmann & Bigler 2011;  
66 Büntgen *et al.* 2019; Fatichi *et al.* 2019; Fleischer *et al.* 2019; Brienen *et al.* 2020), limited to  
67 young forests (Norby & Zak 2011), and absent in mature forests (Jiang *et al.* 2020). This  
68 argument can be linked to two hypothesised mechanisms. First, the *progressive nitrogen*  
69 *limitation* hypothesis (Luo *et al.* 2004) states that soil N gets progressively depleted as biomass  
70 stocks accumulate. By implication, old-growth forests are prone to N scarcity, reducing growth  
71 and triggering additional feedback via increases in the C:N ratio of litter and ensuing decreases  
72 in net mineralisation rates. Second, the *grow-fast-die-young* hypothesis (hereafter GFDY)  
73 (Bugmann & Bigler 2011; Körner 2017; Büntgen *et al.* 2019; Brienen *et al.* 2020) posits a  
74 reduced longevity of fast-growing trees, as described in more detail below. Both hypotheses

75 predict that a positive response of biomass stocks to enhanced growth would be reduced or  
76 fully suppressed in mature stands. Indeed, the first FACE experiment conducted in a mature  
77 stand did not show increased carbon sequestration at the ecosystem level (Jiang *et al.* 2020),  
78 even if it is not fully established whether the observed response was due to forest demography  
79 or nutrient availability-related mechanisms (Ellsworth *et al.* 2017).

80 The GFDY may result from the evolution of species' life-history strategies along the  
81 resource conservation vs. exploitation spectrum, leading to fast-growing and short-lived  
82 species at one end (mostly pioneers in forest succession), and slow-growing and long-lived  
83 species at the other end. The GFDY trade-off could also be the outcome of forest demography  
84 processes leading to a reduction of carbon residence time when tree growth is enhanced over  
85 time across individuals in a stand. While much empirical support for the GFDY hypothesis is  
86 based on variations across species (Loehle 1988; Wright *et al.* 2010; Brien *et al.* 2015), the  
87 emergent negative feedback between growth and biomass changes has also been argued to  
88 govern the response of forest stands to environmental change in the absence of effects by  
89 species replacement (Bugmann & Bigler 2011; Brien *et al.* 2020). Growth-longevity trade-  
90 offs within species have been found previously (Bigler & Veblen 2009; Büntgen *et al.* 2019).  
91 The mechanisms underlying the negative feedback at the forest stand scale relate to  
92 competition for light and the tree's C balance. Accelerated growth and crown expansion under  
93 a constant canopy space constraint (Zeide 1993) can drive the exclusion of short trees from the  
94 canopy, intensifying competition for light, and potentially enhancing their mortality.  
95 Consequently, accelerated growth can speed up the tree's life cycle through earlier mutual  
96 shading in a closed forest stand. Faster growth can also lead to earlier attainment of a critical  
97 tree size where hydraulic, mechanical, or C balance constraints (such as insufficient investment  
98 into defence) pose limits to further growth and may trigger mortality (Collalti *et al.* 2020;  
99 McDowell *et al.* 2022).

100 Allometric relationships of tree diameter, height, and crown area, combined with the  
101 packing constraint, lead to an emergent relationship between average tree size or biomass and  
102 the number of trees per unit area in closed-canopy forests. For monospecific and even-aged  
103 stands, this relationship has been described by a power-law relationship of the number and  
104 quadratic mean diameter of trees in a closed forest stand - Yoda's Law (Yoda 1963). Forest  
105 data following Yoda's Law align along the so-called self-thinning line (STL) - the linear form  
106 of the tree number vs. mean tree size relationship in a double-logarithmic plot. As a forest stand  
107 matures, the increase in tree size and the simultaneous decrease of tree number, i.e., density-

108 driven mortality, is determined by the intercept and slope of the STL. The use of STLs has a  
109 long tradition in forest management (West *et al.* 1997; Enquist *et al.* 1998) and research  
110 (Pretzsch 2006; Charru *et al.* 2012). Prescribed, site-specific and temporally stationary STLs  
111 have been used in forest demography models (Mäkelä *et al.* 2000) for simulating forest stand  
112 dynamics and density-driven mortality, subject to the packing constraint (Landsberg & Waring  
113 1997).

114 By implication of a stationary STL, accelerated growth of trees will simply lead to their  
115 accelerated progression along the constant STL - consistent with the GFDY hypothesis. Hence,  
116 the relative change in biomass stocks should be negligible, irrespective of the relative  
117 enhancement of growth, because total stand-level biomass is largely constant along the STL.  
118 However, the position of the STL is a reflection of site quality (climate and soil properties) and  
119 is affected by species identity (Forrester *et al.* 2021). Although temporal changes in the STL  
120 are still in doubt (Pretzsch *et al.* 2014), a recent study found that the STL shifted such that  
121 forest stands were able to carry higher biomass stocks in a CO<sub>2</sub> fertilization experiment  
122 (Kubiske *et al.* 2019). Thus, analyzing the changes in the self-thinning trajectories is a sound  
123 way to tackle the GFDY hypothesis. To follow this approach, data from forest inventories are  
124 particularly valuable, even though many forest inventory plots are affected by prior  
125 management and cannot be assumed to have reached maturity and, consequently, steady-state  
126 biomass stocks. Still, long-term observations from unmanaged closed-canopy forest plots offer  
127 a unique opportunity to investigate growth-longevity trade-offs driven by self-thinning and  
128 environmental changes.

129 Global Dynamic Vegetation Models (DGVMs) are widely used for simulating the  
130 response of the terrestrial C cycle to global environmental change (Arora *et al.* 2019;  
131 Friedlingstein *et al.* 2021). However, these models have traditionally relied on simplifications  
132 of forest stand dynamics by resolving only an average individual tree (Sitch *et al.* 2003; Fisher  
133 *et al.* 2019), thus not mechanistically accounting for size-dependent light competition and  
134 mortality (Purves *et al.* 2008; McDowell *et al.* 2011; Evans 2012; Bugmann *et al.* 2019).  
135 Therefore, such models are not suitable to investigate mechanisms underlying the GFDY  
136 hypothesis. This simplification may also imply unrealistic simulations of growth-biomass  
137 relationships under environmental change (Friend *et al.* 2014; Yu *et al.* 2019; Pugh *et al.* 2020).  
138 For example, a constant background mortality specified in models (Bugmann *et al.* 2019) may  
139 imply an overestimation of the relative change in biomass stocks per unit relative change in

140 growth (*constant turnover rate*, Box 1), or a constant prescribed STL (Landsberg & Waring  
141 1997) may imply an underestimation of the same (*constant self-thinning*, Box 1).

142 \_\_\_\_\_

### 143 **Box 1. Approach to link changes in growth, biomass and stand density**

144 Mechanistic models (e.g., DGVMs) represent the carbon cycle in terrestrial ecosystems as a  
145 cascade of pools and fluxes (Randerson *et al.* 1997; Smith *et al.* 2013). The assumption that  
146 pool-specific residence times are independent of input fluxes and pool sizes, combined with  
147 constant relative allocation of fluxes to downstream pools and respiration, leads to linear  
148 systems dynamics (Luo & Weng 2011; Xia *et al.* 2013) and a proportional scaling of fluxes  
149 and pools with the ultimate C input flux to the system - CO<sub>2</sub> assimilation by photosynthesis.  
150 Density-driven mortality is a process that introduces a negative relationship between biomass  
151 C residence times and biomass production, thus triggering a feedback which leads to a  
152 deviation from linear systems dynamics. The analysis presented here is designed to diagnose  
153 this deviation from model outputs by investigating relative changes in biomass (*B*) and growth  
154 (*G*).

155 Let us consider the wood C pool size, i.e., biomass (*B*) corresponding to the difference between  
156 growth (*G*) and mortality (*M*):

$$157 \quad \frac{dB}{dt} = G - M$$

158 The wood C pool dynamics can also be described by first-order kinetics, such as:

$$159 \quad \frac{dB}{dt} = G - kB$$

160 With  $k = \frac{1}{\tau}$  describing the carbon turnover rate, i.e., the inverse of carbon residence time.

161 At the steady-state,  $\frac{dB}{dt} = 0$ , and thus the wood C pool size is equal to:

$$162 \quad B = \frac{1}{k}G \Rightarrow \frac{dB}{B} = \frac{dG}{G}$$

163 Three cases can be distinguished and have different implications for changes in the self-  
164 thinning relationship in response to changes in *G*.

165 i) *Constant turnover rate*, ( $\frac{dB}{B} = \frac{dG}{G}$ ), which implies that a relative enhancement of *G* leads to  
166 an equal relative enhancement of *B* and a shift upwards in the STL. This linear response can  
167 also be seen when carbon residence time is modelled as a function of the climate or prescribed  
168 disturbances even if effective residence time change.

169 ii) *Accelerated turnover*, ( $\frac{dB}{B} < \frac{dG}{G}$ ), an intermediate case which leads to a non-linear response  
 170 where the relative increase in B is smaller than the relative increase in G. Carbon turnover time  
 171 is reduced but an upward shift in the STL is still observed.

172 iii) *Constant self-thinning*, ( $\frac{dB}{B} = 0$  in case of constant B along the STL), which implies that G  
 173 enhancement accelerates tree life cycle to a degree that nullifies the change in B, as underlined  
 174 in the GFDY hypothesis. Trees progress faster along the STL, but the position remains  
 175 unchanged.

176 Considering this link between biomass and the STL, cases *i* and *ii* are marked with an upward  
 177 shift of the STL, whereby the upward shift is larger for *i* than for *ii*. Investigating STL changes  
 178 over time and in relation to variations in *G* thus yields insight into the (essentially unobservable  
 179 but key) steady-state *G-B* relationship.

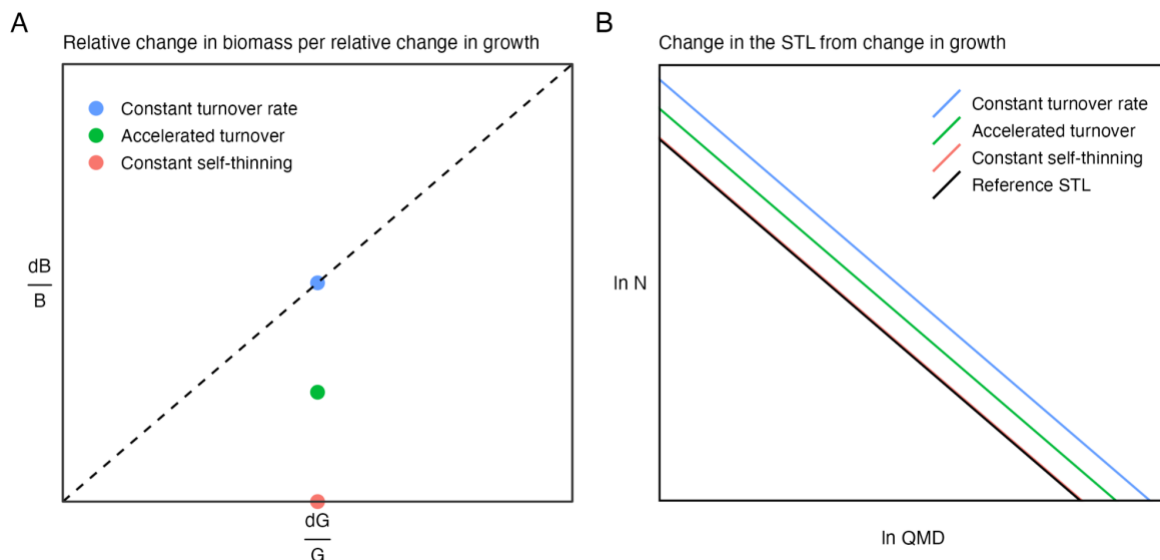

180  
 181 **Conceptual model of biomass and STL responses to growth enhancement.** (A) Responses  
 182 of biomass stocks where an enhancement in growth may lead to no biomass increment  
 183 (*constant self-thinning*, red circle) or to equal relative biomass increment (*constant turnover*  
 184 *rate*, blue circle in the dashed 1:1 line). (B) Responses of the STL where growth enhancement  
 185 may lead to no changes in the STL (*constant self-thinning*, red line on top of the lower solid  
 186 black line, considered as a reference STL) or to a shift upwards in the STL (*constant turnover*  
 187 *rate*, blue line). The intermediate stages of these two extreme assumptions representing an  
 188 *accelerated turnover* are shown by a green circle (A) and line (B).

189 \_\_\_\_\_

190 Here, we evaluated empirical and theoretical support for the GFDY hypothesis by  
191 investigating observed and simulated changes in the relationship between growth and biomass,  
192 and the underlying mechanisms in mature forest stands. We used long-term forest data from  
193 unmanaged stands in Switzerland to evaluate whether the STL has shifted through time and  
194 whether variations in the STL are influenced by stand-level growth. Then, using a vegetation  
195 demography model (LM3-PPA, Weng *et al.* 2015, 2019) that combines a treatment of tree-  
196 level physiology and C balance with the simulation of competition for light and mortality, we  
197 explored the underlying mechanisms and investigated under which conditions and model  
198 formulations persistent biomass stock increases result from growth enhancements.

## 199 **2. Material and methods**

### 200 **2.1. Observed forest trends**

#### 201 **2.1.1. Forest data**

202 Inventory data from mixed forests were obtained by combining observations from three  
203 sources: the Swiss National Forest Inventory (NFI) (Fischer & Traub 2019), the Experimental  
204 Forest Management (EFM) network (Forrester *et al.* 2021), and the Swiss Natural Forest  
205 Reserves (NFR) (Hobi *et al.* 2020). These data cover a large environmental gradient and a  
206 variety of site conditions, making Swiss forests an interesting study case. From the compiled  
207 dataset, we selected unmanaged plots based on relevant information specific to each original  
208 dataset. We selected NFI plots free of management for at least 70 years. This information was  
209 based on standardized interviews with the forest services (Portier *et al.* 2021). We considered  
210 the EFM plots with no intervention since monitoring started, with an average of 40 years. None  
211 of the NFR plots has experienced any management since the establishment of the forest  
212 reserves, with an average of 85 years unmanaged. The combined dataset covers the period from  
213 1933 to 2019 and features 516 plots from the NFI, 18 plots from the EFM, and 269 plots from  
214 the NFR. The measurement intervals varied between 10 and 12 years, depending on sampling  
215 design, growth rates and environmental conditions (see table S1 for more details on data  
216 characteristics).

#### 217 **2.1.2. Stand measurements**

218 In most cases, tree diameter at 1.3 m height (DBH, cm) was measured on all trees with  
219  $DBH \geq 4$  cm (NFR), 8 cm (EFM), or 12 cm (NFI). For each stand, quadratic mean diameter  
220 (QMD, cm), stand density (N, trees  $ha^{-1}$ ), and total biomass (B,  $kg\ m^{-2}$ ) were calculated for  
221 each measurement year. Biomass was estimated for the EFM and NFR plots following the



222 allometric equations described in Forrester *et al.* 2017, where biomass is predicted from DBH  
223 and stand basal area. Species-specific equations included wood density ( $\text{g cm}^{-3}$ ), or specific  
224 leaf area (SLA,  $\text{m}^2 \text{kg}^{-1}$ ) also obtained from Forrester *et al.* 2017. The NFI dataset provided  
225 biomass estimates following the methodology described in Fischer & Traub 2019. For these  
226 plots, biomass is calculated from the estimated volume of the living trees based on tree-species-  
227 specific wood densities. Net biomass change ( $\Delta B$ ) was estimated as  $\text{kg m}^{-2} \text{yr}^{-1}$  by dividing the  
228 biomass difference from successive pairs of measurements by the length of the observation  
229 period. We estimated the dominant species in each stand as the one with the highest basal area  
230 ( $\text{m}^2 \text{ha}^{-1}$ ). To evaluate the changes in species composition over time, we calculated the Bray-  
231 Curtis dissimilarity index (Bray & Curtis 1957) by stem number for each forest stand, which  
232 ranged from 0.14 to 0.26 (Table S1).

### 233 **2.1.3. Data analysis**

234 To estimate the self-thinning relationships, a subset of plots was selected that feature  
235 high stem numbers for a given QMD. The range of QMD in the plots was divided into 30 bins  
236 of ca. 3 cm. Across all bins, we performed a sensitivity analysis to select the best cut-off  
237 criterion between the 55<sup>th</sup>, 75<sup>th</sup>, and 90<sup>th</sup> percentile of plots in terms of their density within each  
238 QMD bin. The STLs were finally estimated using the 75<sup>th</sup> percentile cut-off criterion, resulting  
239 in 318 plots, with measurements spanning from 1946 to 2019. This selection criterion provided  
240 a sufficient sample of plots to allow for statistically estimating changes in the size-density  
241 relationship.

242 The self-thinning relationships were determined by regressing the logarithms of tree  
243 density and QMD. We examined whether the STLs exhibited any shifts over time or any  
244 relationship with stand growth rate. We used Linear Mixed Models (LMMs) to evaluate how  
245 the STL depends on (i) calendar year and (ii) growth anomalies. To estimate growth anomalies,  
246 we first fitted the stand-level  $\Delta B$  against QMD using a Generalized Additive Mixed Model  
247 (GAMM) to remove the size effect on biomass accumulation and extracted the residual values  
248 (Fig. S1). The general structure of the LMMs can be summarised as:

$$249 \quad \ln(N) = \beta_0 + \beta_1 \ln(QMD) + \beta_2 X + b + c + \varepsilon$$

250  
251 where stand density ( $N$ ) is the dependent variable, and the fixed factors are  $QMD$  and  $X$ , which  
252 represent either calendar year or growth anomalies. The parameters  $b$  and  $c$  are the random  
253 intercepts with plot identity and dominant species as grouping variables, respectively, and  $\varepsilon$  is  
254 the residual error term. We did not include an interaction effect between QMD and the

255 predictors because we were interested in the upward shift in the STL, i.e., the change in the  
256 intercept. Fixed effects selection was based on Akaike Information Criterion (AIC), which  
257 selected the models with main effects (no interactions) as the most parsimonious models  
258 (Burnham & Anderson 2003). Parameter estimation was made using restricted maximum  
259 likelihood (REML), which minimises the likelihood of the residuals from the fixed-effect  
260 portions of the model (Zuur 2009). The percentages of variance explained by the fixed and  
261 random effects of the best model were obtained according to Nakagawa & Schielzeth 2013.

262 All statistical analyses were performed using the R statistical software version 4.0.5 (R  
263 Core Team, 2021). We fitted the GAMM using the *gamm4* R package (Wood 2017) and the  
264 LMMs using the *lme4* R package (Bates *et al.* 2015) and calculated p-values with the *lmerTest*  
265 R package (Kuznetsova *et al.* 2017).

## 266 **2.2. Modelling approach**

### 267 **2.2.1. Model description**

268 LM3-PPA is a cohort-based vegetation demography model combining leaf-level  
269 ecophysiology, individual-level competition for light and soil resources, forest structural  
270 dynamics, and biogeochemical processes (Weng *et al.* 2015). The model links a standard  
271 photosynthesis model (Farquhar *et al.* 1980; Leuning *et al.* 1995) with tree growth and  
272 allometry, and scales from the geometry of individual trees to canopy structure and competition  
273 for light using the Perfect Plasticity Approximation (PPA) (Purves *et al.* 2008). The PPA  
274 assumes that individual tree stems and crowns are organised to fill the canopy irrespective of  
275 a tree's lateral positioning and thus form discrete canopy layers, within which all plants receive  
276 the same incoming radiation. Exclusion from the canopy and shading is determined based on  
277 a tree's height in relation to the critical height of the canopy ( $H^*$ ), which is defined as the height  
278 of the shortest canopy tree, whereby the crown areas of canopy trees sum up to unity (minus a  
279 constant gap fraction). LM3-PPA allows for an explicit representation of cohorts of equally  
280 sized individuals and for a treatment of a tree's C balance and mortality. The model thus  
281 simulates size-structured competition for light, demographic processes, and dynamics of a  
282 forest stand. It has been comprehensively documented and evaluated against data from Eastern  
283 US temperate forests (Weng *et al.* 2015) and temperate to boreal forests in North America  
284 (Weng *et al.* 2017). For the present study, we used the model version described in Weng *et al.*  
285 2019 but disabled the nitrogen limitation constraints. We re-calibrated the model for  
286 simulations representing conditions in Central European forests (see section 2.2.3).

## 287 2.2.2. Mortality formulations and parameterization

288 To test the GFDY hypothesis, two alternative assumptions about the structural  
289 dependence of mortality ( $m$ ) were defined for canopy trees (tree height above  $H^*$ ).

290 A size-dependent mortality was specified for the upper canopy layer, assuming the  
291 yearly mortality rate of the upper-canopy trees to follow a power law relationship with tree's  
292 diameter (Eq 1). In this formulation,  $d$  is the diameter in cm,  $p_S$  is the calibrated parameter for  
293 the tree size mortality (scaling coefficient), and  $r_S$  is the exponent that determines the rate at  
294 which mortality increases with  $d$  in the canopy.

$$295 m_S = p_S \cdot d^{r_S} \quad (\text{Eq 1})$$

296 A growth rate-dependent mortality for the upper canopy layer was formulated as a  
297 function of biomass increment to account for a higher mortality rate of fast-growing trees, using  
298 a logistic function (Eq 2).  $\Delta B$  represents biomass increment in kg C,  $p_{GR}$  is the calibrated  
299 parameter for the growth rate mortality,  $a$  is a correction coefficient for the function, and  $r_{GR}$   
300 is the rate at which mortality increases with  $\Delta B$ .

$$301 m_U = p_{GR} \cdot \frac{1}{1 + e^{r_{GR} \cdot (\Delta B - a)}} \quad (\text{Eq 2})$$

302 To evaluate the influence of the shape of the mortality formulations (Eq. 2 and 3), we  
303 set three mortality rates for each mortality formulation ( $r_S = 1.5, 2.5$  or  $4$  and  $r_{GR} =$   
304  $-0.5, -0.8$  or  $-1.4$ ), where the different parameter values control the shape of the curve for  
305 low, medium and high curvature. The mortality parameters were calibrated using a cost  
306 function described in section 2.2.3.

307 The same understory mortality was applied to both model setups, with higher mortality  
308 rates for the smaller and younger understory cohorts (Eq 3). This equation was adapted from  
309 Weng et al. 2015, where  $d$  is the diameter in cm,  $p_U$  is the calibrated parameter and  $a, b$  are  
310 correction coefficients for the understory mortality.

$$311 m_U = p_U \cdot \frac{1 + a \cdot e^{b \cdot d}}{1 + e^{b \cdot d}} \quad (\text{Eq 3})$$

## 312 2.2.3. Model calibration

313 A calibration at the ecosystem-level aggregate was done such that the model was able  
314 to realistically simulate average ecosystem photosynthesis and biomass and adequately  
315 describe forest dynamics, largely representative of the Swiss forest data used here. We  
316 calibrated the model using data from the Lägeren site (CH-Lae), a mixed mountain forest  
317 located on the Swiss Plateau at 800 m asl. Data for this site was obtained from the Long-term  
318 Forest Ecosystem Research (LWF) project (Thimonier *et al.* 2010). A direct calibration was

319 first done from observations and included leaf mass per unit area (LMA,  $\text{kg m}^{-2}$ ), wood density  
320 ( $\text{kg m}^{-3}$ ) and species-specific allometry parameters (Forrester *et al.* 2017). Calibration was then  
321 performed for five model parameters determining the root-shoot ratio, the maximum leaf area  
322 index (LAI) limited by light, a scalar for plant respiration and the mortality parameters for each  
323 formulation ( $p_U$ ,  $p_S$  and  $p_{GR}$ ). The calibrated targets included mean annual ecosystem-level  
324 Gross Primary Productivity (GPP) obtained from the FLUXNET 2015 dataset for Lägeren  
325 (Pastorello *et al.* 2020) and the 95<sup>th</sup> percentile of the LAI in the peak growing season (from  
326 June to August) obtained from MODIS (Myneni *et al.* 2015). We used the LWF data to estimate  
327 stand-level biomass ( $\text{kg ha}^{-1}$ ) and tree size distributions binning five size classes with an  
328 approximately equal number of trees per ha. Parameters were calibrated by minimising the root  
329 mean square error (RMSE) between the observed and modelled targets. The cost function was  
330 defined with equal weighting of errors in all calibrated targets (GPP, LAI, stand biomass and  
331 5-class tree size distribution). Calibration was performed using the Generalised Simulated  
332 Annealing algorithm from the *GenSA* R package (Xiang *et al.* 2013).

#### 333 **2.2.4. Simulations**

334 All simulations were initiated with 0.05 saplings per  $\text{m}^2$  and a single plant functional  
335 type (PFT) representing a dominant temperate deciduous tree, such as *Fagus sylvatica*.  
336 Simulations were run for 1500 years in total, with a spin-up of 700 years to reach steady-state  
337 pool sizes. We used temporally constant model forcing data based on meteorological and  $\text{CO}_2$   
338 information obtained from CRU TS (Harris *et al.* 2020) and FLUXNET2015 (Pastorello *et al.*  
339 2020) via the *ingest* R package (Stocker 2020a). Forcing variables include air and soil  
340 temperature ( $^{\circ}\text{C}$ ), precipitation (mm), radiation ( $\text{W m}^{-2}$ ), atmospheric pressure (kPa),  $\text{CO}_2$   
341 ( $\mu\text{mol mol}^{-1}$ ), wind speed ( $\text{m s}^{-1}$ ), relative humidity (%), and soil water content (%). The LM3-  
342 PPA implementation in the *rsofun* R package (Stocker 2020b) was used.

343 To simulate growth enhancement, the photosynthetic light use efficiency (eLUE) was  
344 increased by two levels (+15% and +30%) after the model spin-up. Higher LUE and a resulting  
345 tree-level growth enhancement mimics the relief of limitations to carbon assimilation in a  
346 generic sense - be it via a growing season extension, enhanced nutrient inputs, relieving  
347 reductions of photosynthesis by low temperature, or increasing atmospheric  $\text{CO}_2$ . For each  
348 mortality model structure (size and growth rate-dependent) and for each curve shape ( $r_{1-3}$ ),  
349 we ran the simulations for control and the two levels of eLUE.

350 We evaluated changes in annual total ecosystem-level biomass production ( $B$ , kg C m<sup>2</sup>),  
351 growth ( $G$ ) and mortality ( $M$ ) over time. Note that here,  $G$  and  $M$  are defined as fluxes of C (kg  
352 C m<sup>2</sup> yr<sup>-1</sup>), thus differing from tree-level growth, commonly expressed as an increment of  
353 diameter per unit of time, or mortality defined as a fraction of dying trees per unit of time. We  
354 then calculated the relative changes in total biomass ( $dB/B$ ), mortality ( $dM/M$ ), carbon  
355 turnover rate ( $dk/k$ ), and longevity ( $dL/L$ ) by comparing  $G$ ,  $M$ , and  $B$  averaged over 600  
356 years before and after the step increase in LUE, and evaluated their ratio with respect to relative  
357 changes in growth ( $dG/G$ ). The carbon turnover rate  $k$  (yr<sup>-1</sup>) was defined as the ratio between  
358  $M$  and  $B$ , i.e., the inverse of carbon residence time  $\tau$  (yr;  $k = 1/\tau$ ). Longevity was defined here  
359 as the age of the oldest cohort present within the tile.

360 We also quantified the changes in the self-thinning trajectories resulting from eLUE  
361 conditions. We selected the last 600 years of the simulations to ensure that the steady state had  
362 been reached. We tested if the STLs were influenced by the levels of LUE by fitting linear  
363 models (LMs) with stand density (log-scale) as the dependent variable, and QMD (log-scale)  
364 and LUE (as a proxy of growth enhancement) as predictors. The residuals of the models were  
365 checked for normality and homoscedasticity.

## 366 **2.2.5. Evaluation**

367 To evaluate the performance of the model and the overall simulation results, we first  
368 ran a sensitivity analysis for the allometric scaling parameter relating diameter and biomass in  
369 order to test the changes in the G-B relationship. We used a species-specific allometry  
370 parameter for European beech ( $\theta_{BM} = 2.36$  in the LM3-PPA model) to run the simulations and  
371 considered a plausible range of parameter values ( $\theta_{BM} = 2.20, 2.36, 2.50$ ) to test the sensitivity  
372 of the G-B relative changes. Second, we evaluated the simulated relationship between growth  
373 rate and mean age of canopy trees with respect to the expected negative growth rate-longevity  
374 relationship found in the literature (Bigler and Veblen, 2009; Manusch et al., 2012). Cohort-  
375 level simulations for each mortality assumption (structure and curve shape) and each LUE level  
376 were used to estimate mean growth rate and age of the canopy trees. We selected the two tallest  
377 cohorts to estimate the mean age of the canopy trees as a proxy of life expectancy. Mean growth  
378 rate was calculated for those cohorts as the diameter increment (mm yr<sup>-1</sup>) averaging across  
379 transient years.

## 380 **3. Results**

### 381 **3.1. Observational changes in the self-thinning relationships**

382 The STL shifted upward over time (Fig. 1A), i.e., for a given QMD, stands tend to have  
383 become denser through time. This emerges from the patterns over time and across sites, thus  
384 indicating that the relationship between biomass and density has not been stationary but has  
385 shifted significantly ( $P < 0.001$ ) over the past decades (see Table S2). The upward shift of the  
386 STL over time, i.e., the average increase in density for a given QMD, was  $\approx 0.03$ - $0.04\%$  per  
387 year for the 55<sup>th</sup>, 75<sup>th</sup>, and 90<sup>th</sup> percentiles. Unmanaged Swiss forests also exhibited a change  
388 in the STL when trees grow more vigorously (Fig. 1B). The LMMs identified a significant  
389 ( $P < 0.001$ ) positive effect of *growth anomaly* on the intercept of the STL (Table S2). The  
390 average increase in density for a given QMD was  $\approx 0.80$ - $1.17\%$  per unit of *growth anomaly*  
391 ( $\text{kg m}^2 \text{ yr}^{-1}$ ) for the 55<sup>th</sup>, 75<sup>th</sup>, and 90<sup>th</sup> percentiles. The inclusion of both predictors improved  
392 model performance based on lower AIC ( $-539.50 < -512.23$  for *year* and  $-305.86 < -299.63$  for  
393 *growth anomalies*). The percentage of stand density variance explained by the fixed effects,  
394 i.e., the marginal pseudo- $R^2$ , ranged from 86 to 87% for both models.

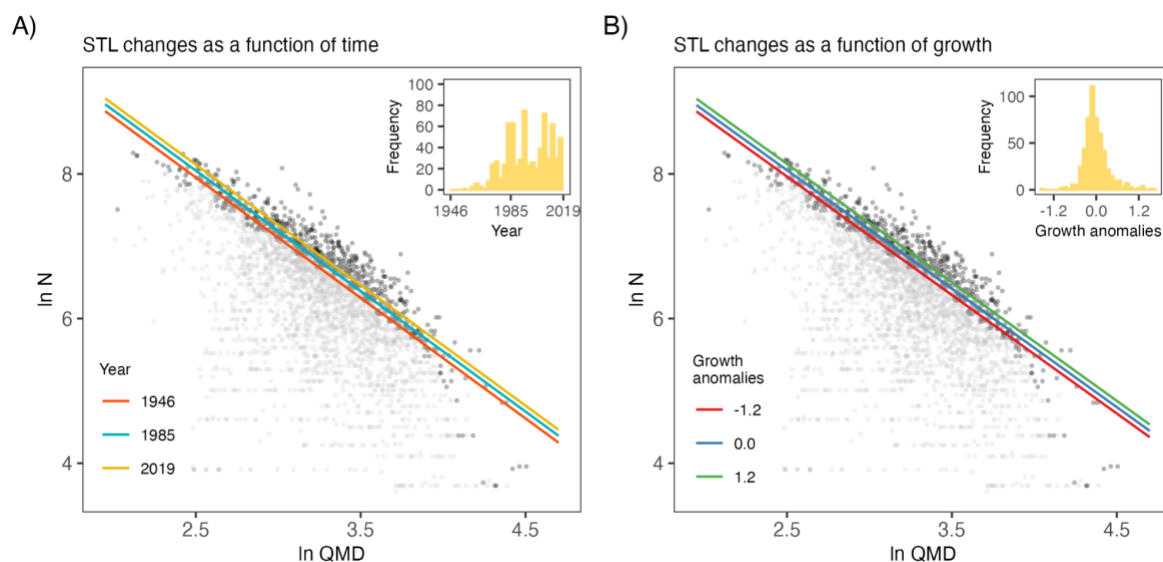

395  
396 **Figure 1.** Stand density ( $N$ , trees  $\text{ha}^{-1}$ ) (log-scale) as a function of QMD (cm) (log-scale) and  
397 (A) calendar year, or (B) growth anomalies over the study period for the plots of the pooled  
398 NFI, EFM and NFR networks. Dark grey points represent data from plots selected within the  
399 75<sup>th</sup> percentile and used for model fitting; light grey points are the observations below the  
400 selected criterion. Coloured lines represent the fitted STLs. The embedded panels display the  
401 distributions of (A) calendar year and (B) growth anomalies for all forest data.

### 402 3.2. Simulated changes in biomass due to growth enhancement

403 In response to a 15% (30%) increase in LUE,  $G$  increased by 17% (35%) on average  
404 across the last 600 simulation years before and after the step increase. The higher stimulation

405 of  $G$  compared to LUE is due to allocation to woody biomass in the model.  $B$  increased in  
406 response to  $G$  enhancements in all model setups, irrespective of the mortality structure and  
407 shape of the mortality parameterization (Figs. 2A-D and 3A-D). However, the magnitude of  $B$   
408 varied systematically with the structure and shape of the mortality formulations. Following the  
409 size-dependent mortality parameterization,  $B$  increased by 9-14% (19-28%), and the higher the  
410 curvature of the mortality parameterization, the lower the increase in  $B$ . Following the growth-  
411 rate dependent mortality parameterization,  $B$  increased by 17% (33%), whereas the curvature  
412 of the mortality parameterization had no effect on  $B$ . Once a new steady state of biomass stocks  
413 had been attained in the simulations,  $M$ , expressed in units of living biomass loss per unit area  
414 and time, attained the same average level as  $G$  in all simulations and model formulations. This  
415 is a direct consequence of mass conservation but also indicates that under environmental  
416 changes and gradually increasing  $G$ ,  $M$  increases in parallel, albeit with a lag. The considerable  
417 temporal variations of  $B$  and  $M$  reflect forest stand dynamics under dynamic equilibria before  
418 and after the step increase in eLUE and, consequently, growth.

419         Comparing the relative increases of different variables to the relative increase in growth  
420 yields insights into the (non-) linearity of the system representing forest dynamics and biomass  
421 stocks (Box 1). Although  $B$  generally increases in response to increases in  $G$  - irrespective of  
422 mortality parameterizations - the relative increase in  $B$  is always smaller than the relative  
423 increase in  $G$  for the size-dependent mortality formulation. The ratio of the respective relative  
424 changes varies substantially depending on the curvature of the mortality parameterization (Fig.  
425 2E). This indicates a distinct non-linearity in the system, introduced by the link between  $G$  and  
426  $B$ , and illustrates the degree of this non-linearity (deviation from the 1:1 line in Fig. 2E) is  
427 governed by the curvature (non-linearity) of the mortality parameterization as a function of tree  
428 size. The growth-rate dependent mortality formulation does not introduce such non-linear  
429 behaviour, and the relative increase in  $B$  is almost identical to the relative increase in  $G$  (Fig.  
430 3E). Reflecting mass balance constraints, relative increases in  $G$  and  $M$  are always identical,  
431 irrespective of the structure and shape of the mortality parameterization (Fig. 2F and 3F).

432         Substantial variations in the relative increases in  $B$  for a given relative increase in  $G$  are  
433 reflected by the relative changes in the turnover rates and maximum tree longevity. Using the  
434 size-dependent mortality formulation, turnover rates increased (Fig. 2G) and maximum tree  
435 longevity decreased (Fig. 2H), irrespective of the curvature of the mortality formulation. Using  
436 a low curvature parameter of the mortality function ( $r_{s1} = 1.5$  in Fig. 2A), smaller relative  
437 changes in carbon turnover rates and tree longevity were simulated in response to growth

438 enhancements than when using a pronounced curvature. The highest curvature showed the  
 439 highest relative increase in turnover rates and the strongest relative decrease in tree longevity  
 440 in response to growth enhancements. No changes in turnover rates and only small changes in  
 441 tree longevity were found in response to growth enhancements when mortality was a function  
 442 of growth rate, independently of the shape of the mortality parameterization (Figs. 3G and 3H).  
 443 Overall, relative increases in turnover rates were smaller than relative increases in  $G$ , thus  
 444 leading to a positive response of  $B$  in all model setups.

445 Taken together, the model simulates an acceleration of forest dynamics and a  
 446 shortening of tree longevity when using a size-dependent mortality formulation. This is  
 447 measured by the increase in turnover rates, which can be seen along with a reduction of the  
 448 carbon residence time due to the speeding up of the life cycle (Fig. S2A). As trees grew faster,  
 449 tree size distributions shifted towards larger sizes (Fig. S3A), despite the reduction in their  
 450 longevity. This acceleration of forest dynamics did not preclude an increase in steady-state  
 451 biomass stocks - irrespective of the assumptions regarding the mortality parameterization. If  
 452 tree mortality was assumed to increase as a direct consequence of faster growth, as embodied  
 453 in the growth rate-dependent mortality formulation, only slight decreases in carbon residence  
 454 time were found (Fig. S2B) and trees reached larger sizes before death (Fig. 3B). These  
 455 simulations did not yield a reduction of tree longevity, and growth enhancements translated  
 456 directly and nearly linearly into biomass enhancements.

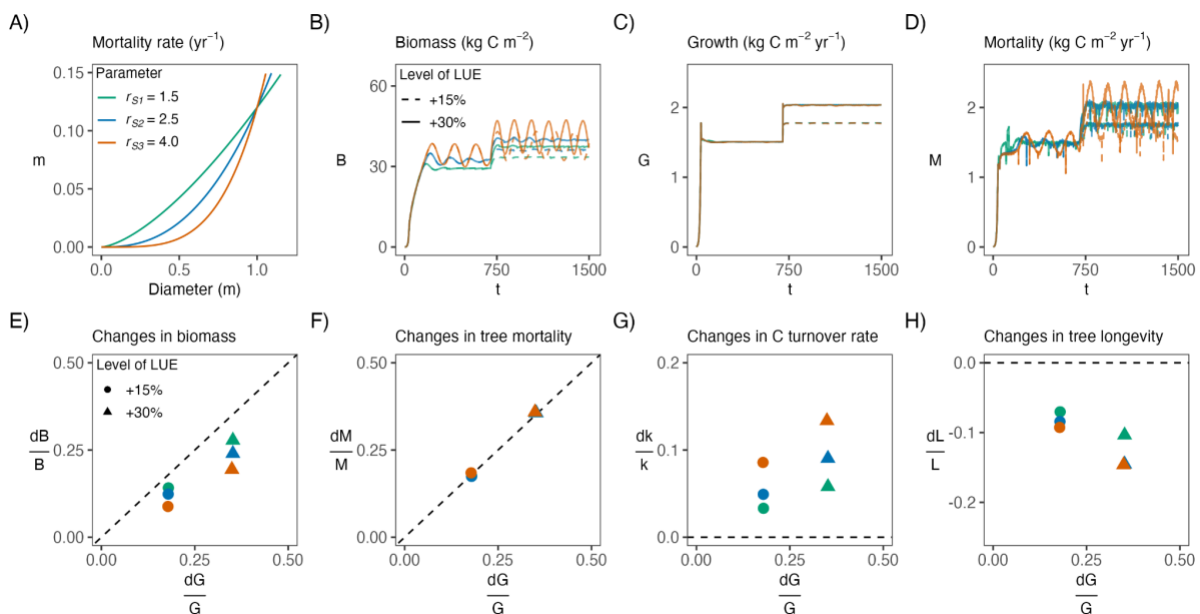

457  
 458 **Figure 2.** Model simulations for size-dependent mortality and different mortality shapes (A)  
 459 showing the absolute changes in biomass (B), growth (C) and mortality (D) over time and the  
 460 relative changes in biomass (E), mortality (F), carbon turnover rate (G) and longevity (H) with



461 respect to relative changes in growth. Colours show the mortality shape (low to high curvature),  
 462 and line types/point shapes show simulated increases in LUE (15% and 30%). Dashed lines  
 463 following the 1:1 line (E, F) or the zero-value (G, H) represent the hypothetical *constant*  
 464 *turnover rate*.

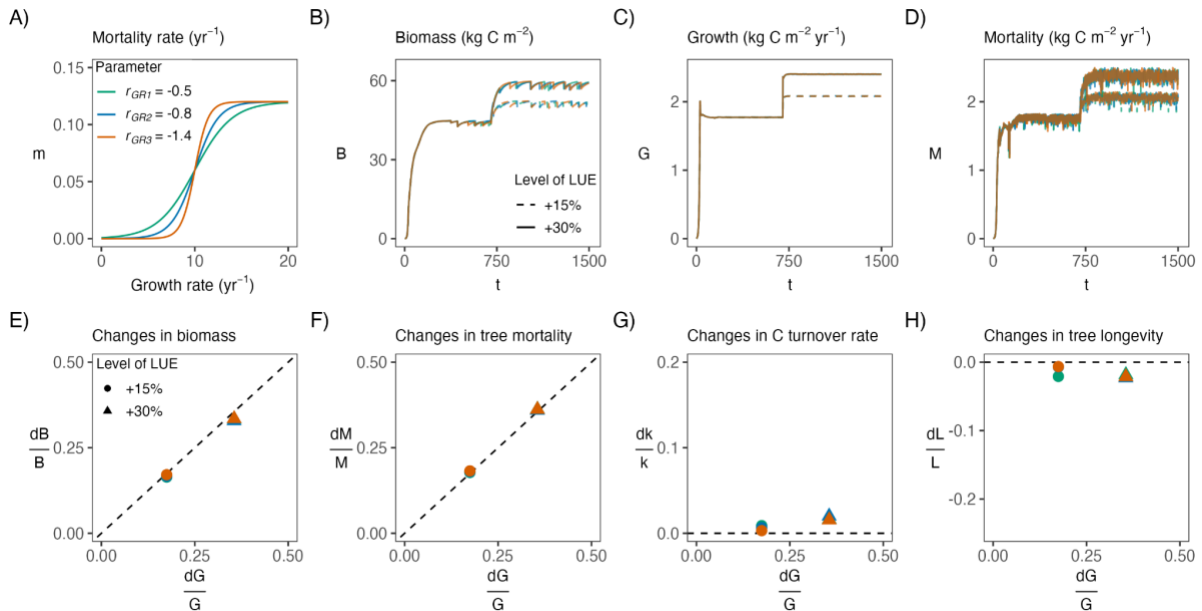

465  
 466 **Figure 3.** Model simulations for growth rate-dependent mortality and different mortality  
 467 shapes (A) showing the absolute changes in biomass (B), growth (C) and mortality (D) over  
 468 time and the relative changes in biomass (E), mortality (F), carbon turnover rate (G) and  
 469 longevity (H) with respect to relative changes in growth. Colours show the mortality shape  
 470 (low to high curvature), and line types/point shapes show simulated increases in LUE (15%  
 471 and 30%). Dashed lines following the 1:1 line (E, F) or the zero-value (G, H) represent the  
 472 hypothetical *constant turnover rate*.

### 473 3.3. Simulated changes in the self-thinning relationships

474 Regardless of the mortality formulation, eLUE simulations led to an upward shift in the  
 475 STL (Fig. 4), suggesting a significant change in the maximum stand density and pointing to  
 476 larger trees for a given stand density or denser stands for a given average tree size. Biomass  
 477 was largely constant along the STLs and thus, an upward shift of the STL indicated that  
 478 biomass increased at conditions where self-thinning is acting. Further, our results revealed the  
 479 influence of the mortality structure and parameterization on the degree to which the STL is  
 480 shifted in response to growth enhancements. Size-dependent mortality with a flatter shape  
 481 predicted a stronger increment of stand density for a given QMD ( $\approx 2\%$  for 15% eLUE and  
 482  $\approx 3\%$  for 30% eLUE, Fig. 4A), while functions with a higher curvature led to a weaker change

483 in the STL ( $\approx 1\%$  for 15% eLUE and  $\approx 2\%$  for 30% eLUE, Figs. 4B and 4C). For the growth  
 484 rate-dependent mortality formulation, the STL had a significant increase in the intercept,  
 485 indicating that stands support higher densities when increasing growth, independently of the  
 486 shape of the curve ( $\approx 2\%$  for 15% eLUE and  $\approx 3\%$  for 30% eLUE, Figs. 4D-F).

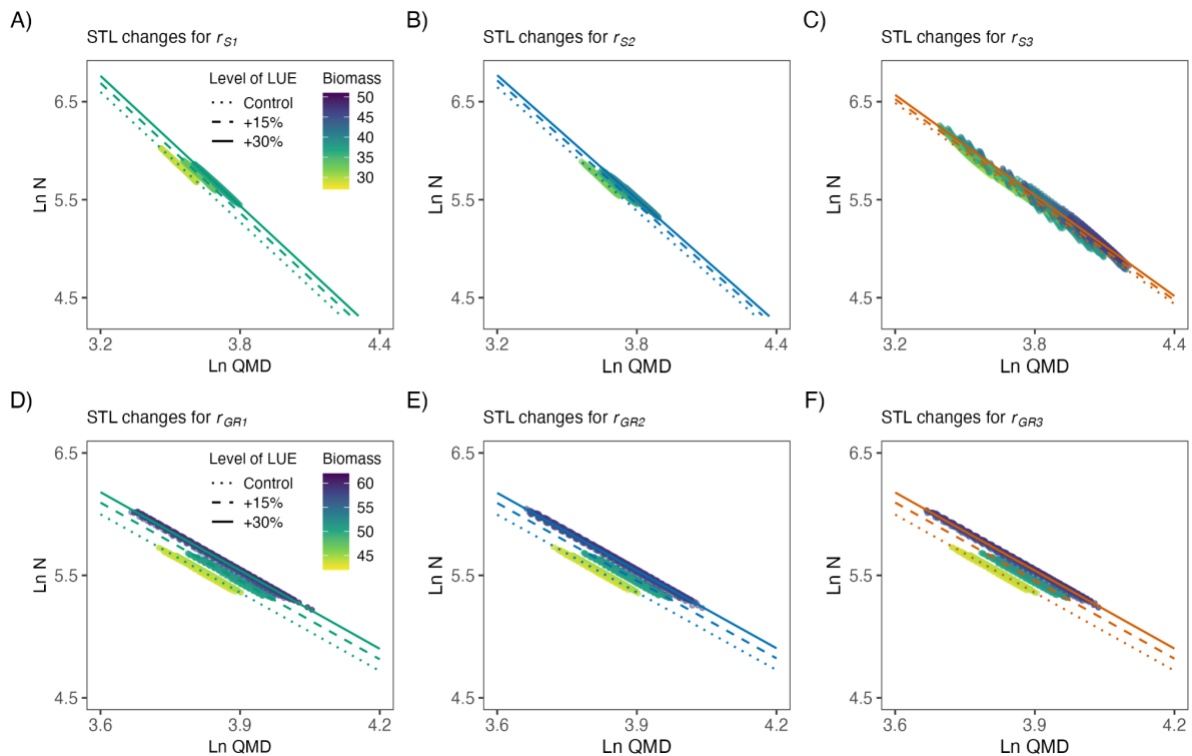

487  
 488 **Figure 4.** Simulated relationships between stand density ( $N$ , trees  $\text{ha}^{-1}$ ) and quadratic mean  
 489 diameter (QMD, m) for each alternative mortality formulation: (A-C) size-dependent, (D-F)  
 490 growth rate-dependent and each curvature shape ( $r_1$ - $r_3$ , line colours) under simulated increases  
 491 in LUE (line types). The log-log slopes of the regression lines represent the maximum stand  
 492 density. Points are the simulated data for each combination coloured as a function of total  
 493 biomass ( $\text{kg C m}^{-2}$ ).

### 494 3.4. Evaluation of model performance

495 The sensitivity analysis of the allometric scaling parameter that related diameter and  
 496 biomass confirmed the positive relationship between growth and biomass, for all the plausible  
 497 values tested (Fig. S4). For all values of  $\theta_{BM}$  (2.20, 2.36 and 2.50), the size-dependent mortality  
 498 led to a non-linear  $G$ - $B$  relationship (Figs. S4A-C). The growth-rate dependent mortality had a  
 499 linear behaviour for all the parameter values considered, with relative increases in  $G$  being  
 500 similar to increases in  $B$  (Figs. S4D-F). In both mortality structures, the higher the  $\theta_{BM}$ , the  
 501 stronger the relative increase in  $B$ .

502           The relationship between simulated mean growth rates and age of the canopy trees for  
503 the different mortality assumptions is shown in Fig. S5. The size-dependent mortality featured  
504 a strongly negative relationship between growth and life expectancy (Fig. S5A), independent  
505 of the shape of the mortality curve ( $r_p = [-0.99, -0.95]$ ). For these simulations, enhanced growth  
506 rates lead to shorter life expectancy. The growth rate-dependent mortality also featured a  
507 negative correlation between mean growth and age of canopy trees (Fig. S5B), which varied  
508 depending on the curve shape ( $r_p = [-0.97, -0.80]$ ). In this case, there are at least two opposite  
509 factors affecting the mean age of the canopy trees. If trees grow faster, they will have a high  
510 mortality rate. However, the large-sized trees prevent the young trees from reaching the top  
511 layer. If trees grow slower, they will have a low mortality rate and thus higher longevity, but  
512 younger trees get into the upper canopy. The shape of the mortality curve may play a role in  
513 determining the equilibrium state, i.e., the mean age at equilibrium tree compositions.

#### 514 **4. Discussion**

515           We combined forest observations and model simulations to evaluate to what extent tree  
516 growth enhancements lead to persistent increases in forest biomass stocks. We found that the  
517 position of the STL has shifted upwards over time and as growth rate increased in unmanaged,  
518 closed-canopy forests in Switzerland. A biomass increase under enhanced growth was  
519 simulated in all model setups, but the magnitude of the change varied substantially depending  
520 on the shape of the mortality parameterization. The relative changes in biomass were smaller  
521 than the relative changes in growth, indicating a reduction in the apparent carbon residence  
522 time and in tree longevity. The increase in steady-state biomass with enhanced growth was also  
523 reflected in the upward shift of the modelled STL - consistent with observations.

#### 524 **4.1. Growth enhancements lead to biomass increments**

525           Irrespective of the mortality assumption, a positive net increment in biomass was  
526 modelled despite the reduction in carbon residence time and tree longevity. When mortality  
527 was size-dependent, our study framework indicated a non-linear  $G-B$  relationship, as described  
528 by the *accelerated turnover* response (Box 1). These findings suggest a trend towards higher  
529 densities per unit of tree size and reveal that increasing biomass stocks and decreasing C  
530 residence times are not mutually exclusive. This reconciles reports of tree longevity reductions  
531 (Bugmann & Bigler 2011; Büntgen *et al.* 2019; Brienen *et al.* 2020) with model predictions of  
532 increased forest biomass (Terrer *et al.* 2019; Yu *et al.* 2019; Pugh *et al.* 2020), both of which  
533 are consistent with the mechanistic understanding developed here. When mortality was defined  
534 in terms of growth rate, our results showed an almost linear  $G-B$  relationship, reflecting a

535 *constant turnover rate* response (Box 1). This yields only a small decrease in longevity and  
536 carbon residence time, as has been represented in models that account for a constant  
537 background mortality (Bugmann *et al.* 2019). Notably, none of the mortality assumptions  
538 implemented in the model, nor the data suggested a *constant self-thinning* response (Box 1), as  
539 underlined in the GFDY hypothesis. Yet, the ratio of relative changes in growth and biomass  
540 was critically affected by the shape of the mortality formulations. As we show here, the stronger  
541 the curvature in the size-mortality parameterization, the smaller the increase in biomass and  
542 the smaller the upward shift in the STL. There is still uncertainty about model structural  
543 choices, and different assumptions and parameterizations may lead to contrasting results. For  
544 example, contrasting results by Brienen *et al.* 2020 indicated a lack of long-term biomass  
545 increments in response to a temporal trend towards increased growth. This is possibly related  
546 to their choice of a highly non-linear size-mortality parameterisation, fitted to data that reflects  
547 a growth-longevity relationship across species - not a temporal relationship that underlies the  
548 forest inventory data analysed here.

549 Carbon assimilation rates in terrestrial ecosystems have increased steadily as  
550 atmospheric CO<sub>2</sub> concentrations have risen over the past century (Campbell *et al.* 2017; Walker  
551 *et al.* 2021). In parallel, rising temperatures have led to an expansion of the growing season in  
552 winter-cold climates (Piao *et al.* 2019). Simultaneously, a substantial terrestrial C sink has  
553 persisted (Keeling *et al.* 1996; Friedlingstein *et al.* 2021). Yet, gains in carbon storage, driven  
554 by increased photosynthesis and growth, have been argued to be transitory (Körner 2017), and  
555 ultimately limited by other resources (e.g., nutrients) and negative feedbacks arising through  
556 forest dynamics. These mechanisms linking changes in terrestrial photosynthesis and C storage  
557 remain uncertain (Huntzinger *et al.* 2017) because a multitude of processes and feedbacks are  
558 involved at different scales, ranging from leaves to trees, forest stands, ecosystems, the  
559 landscape, and the globe (Walker *et al.* 2021; Maschler *et al.* 2022). The *G-B* relationships and  
560 the STL shifts described here are relevant for the C cycle dynamics and the propagation of  
561 effects by increased photosynthesis and growth to the scale of a forest stand. How the processes  
562 are represented in vegetation models will determine the accuracy of predictions of forest  
563 responses under elevated CO<sub>2</sub> and other environmental changes (Andresen *et al.* 2016; Davies-  
564 Barnard *et al.* 2020; Bugmann & Seidl 2022). With the advent of demographic representations  
565 in global vegetation and terrestrial carbon cycle models, there is a need for constraining  
566 alternative process representations with observations. Novel cohort-based vegetation  
567 demography models (Fisher *et al.* 2018), such as the LM3-PPA, resolve tree age and height

568 structure and enable a more mechanistic treatment of forest dynamics and tree mortality. This  
569 yields a mechanistic foundation to project responses to environmental change and enables  
570 globally distributed forest inventory data to be used for constraining the models. However,  
571 observations are sparse due to the long timescale of forest demographic processes. The  
572 approach taken in this study enabled us to test the GFDY hypothesis via the STL changes  
573 observable from data that inform the unobservable (simulated) steady-state biomass response  
574 to growth enhancement.

#### 575 **4.2. Non-linearity in the growth-biomass relationship**

576 The ratio of relative changes of growth and biomass yields insights for characterising  
577 carbon cycle dynamics in forest models and normalises effects with respect to absolute  
578 magnitudes of simulated biomass and growth. Our study shows that this ratio is subject to the  
579 representation of mortality in the model. In LM3-PPA, the PPA warrants that the tree crowns  
580 fill gaps in the canopy through phototropism (Purves *et al.* 2008). In our simulations, a growth  
581 enhancement skews the distribution of trees to larger sizes, decreases the number of trees in  
582 the canopy, and increases tree numbers in the understory. Under conditions of higher growth,  
583 this replacement is accelerated, leading to higher mortality rates, lower longevity, and a  
584 subsequent decrease in the carbon residence time (Needham *et al.* 2020). We tested the  
585 sensitivity to mortality parameters and model structural choices. However, other processes  
586 affecting resource accessibility to tree individuals and their neighbours may influence the non-  
587 linearity of the  $G$ - $B$  relationship. This includes parameters regarding allometric scaling, height-  
588 dependent crown organisation and light penetration in the canopy. We additionally evaluated  
589 the influence of alternative allometric scaling parameters. This indicated that the finding of  
590 generally positive biomass changes in response to growth increases is robust against a wider  
591 choice of model formulations and parameterizations (see Fig. S3).

592 Understanding the causes of observed mortality trends will help to improve the way  
593 mortality is included in vegetation demography models, which is critical for accurate  
594 projections of global terrestrial carbon storage (Friend *et al.* 2014). Different modes of  
595 mortality (e.g., hydraulic failure, carbon starvation) could be incorporated into models and may  
596 lead to different ratios of relative changes. Different model structural assumptions regarding  
597 light distribution cannot be easily tested within a single modelling framework. Future work  
598 including model intercomparisons to test simulations with a set of alternative models would be  
599 helpful in informing the generality of the positive  $G$ - $B$  relationship found here. Importantly, to  
600 evaluate model reliability in accurately simulating  $G$ - $B$  links, a focus has to be set on whether

601 they capture self-thinning relationships (slope, position, and their change over time) as  
602 suggested by the data. Thus, combined analyses of models and forest observations will be  
603 needed to project how changes in environmental conditions will affect competition for  
604 resources and forest dynamics in a future climate (McDowell *et al.* 2018). A large number of  
605 long-term monitoring forest demographic rates are required to better understand the links  
606 between growth and biomass and to constrain influential, yet not directly observable model  
607 parameters.

### 608 **4.3. Endogenous and exogenous factors affecting carbon residence times**

609 It is of crucial importance to distinguish between changes in carbon residence times  
610 caused by endogenous (i.e., growth, density-driven mortality) and exogenous factors (e.g.,  
611 climate, climate-driven disturbances). Here, we focused on the former. Observations from  
612 tropical forests have suggested that increases in productivity combined with persistently higher  
613 mortality led to shorter carbon residence times (Brienen *et al.* 2015; Hubau *et al.* 2020). Still,  
614 no clear consensus exists about the trade-offs between growth and tree longevity and their  
615 temporal changes within species (Cailleret *et al.* 2017). Determining the growth-lifespan trade-  
616 offs under current environmental conditions is subject to constant growth conditions and  
617 resource availability. However, environmental changes affect growth conditions for all species  
618 and may relieve constraints shifting the trade-offs, as suggested by our results. Changes in tree  
619 mortality are also caused by changes in the environment (DeSoto *et al.* 2020). Disturbances  
620 are becoming more frequent (Sommerfeld *et al.* 2018), leading to enhanced tree mortality  
621 around the world (Senf *et al.* 2018).

622 Evidence suggests that carbon residence times in forest biomass have reduced in the  
623 past (Yu *et al.* 2019) and may be reduced by future climate change. Rising temperature, vapour  
624 pressure deficit (VPD) levels and more frequent drought episodes (Schwalm *et al.* 2017;  
625 McDowell *et al.* 2020) can reduce photosynthetic C uptake as trees close their stomata to  
626 prevent hydraulic failure. This may cancel any potential benefit from elevated atmospheric  
627 CO<sub>2</sub>, leading to lower growth (Yuan *et al.* 2019) and higher mortality (Park Williams *et al.*  
628 2013). Climate-driven risks may thus lead to higher competition for water and override growth-  
629 related forest density trends (Anderegg *et al.* 2020). Our findings highlight that growth  
630 enhancement causes simultaneous increases in biomass and decreases in carbon residence  
631 times and tree lifespans and the non-linearity in the growth-biomass relationship is to be  
632 understood as representing effects within species.

### 633 **4.4. Interpreting self-thinning relationships**

634           The non-linear modelled growth-biomass relationship is consistent with the empirical  
635 results suggesting temporal trends in the STL and a link to growth variations across plots and  
636 time. We applied the STL concept to mixed, often uneven-aged forests in Switzerland to detect  
637 whether constraints governed by density-driven mortality have been relieved. Traditionally,  
638 the focus of the STL has been restricted to even-aged monospecific stands, and the power-law  
639 exponent (i.e., the slope of the STL) was proposed to be constant and universal (Reineke 1933;  
640 Yoda 1963; Westoby 1984). Further studies showed that the STL directly reflects allometric  
641 and metabolic scaling, linking tree size, stand structure and biomass stocks (Enquist *et al.*  
642 2009). Generally, higher intercepts and slopes are associated with fertile soils (Morris &  
643 Charles Morris 2003; Bi 2004), which are able to reach higher densities (Weiskittel *et al.* 2008;  
644 Charru *et al.* 2012).

645           Self-thinning dynamics have also been described in mixed forests (Midgley 2001; Mrad  
646 *et al.* 2020) and the application has been generalised to multispecific stands (Rivoire & Le  
647 Moguedec 2012; Forrester *et al.* 2021). The self-thinning relationship emerges from density-  
648 driven mortality due to resource competition between individuals, neglecting mortality due to  
649 external factors. Our approach excluded areas under management, and we selected plots from  
650 the upper quantiles (featuring high density for a given QMD) as those subject to self-thinning.  
651 By doing so, we ensured to remove or at least minimise external effects from natural or  
652 anthropogenic past disturbances. Indeed, we found a clear negative linear relationship as seen  
653 in pure even-aged stands and we determined the stands where the STL has been reached with  
654 the upper edge of the point cloud.

655           The STL approach allowed us to control for stand age effects on biomass, thus revealing  
656 shifts in biomass storage without having to rely on observations of mature stands. Our  
657 empirical analyses suggested a tendency toward denser stands for a given QMD over time and  
658 indicate that stand density is related to growth vigour. These results are consistent with  
659 empirical evidence from Kubiske *et al.* 2019 who reported increasing intercepts of the STLs  
660 under higher CO<sub>2</sub>, with the consequent higher stand biomass levels in the long term. Recent  
661 findings also indicate that climatic variables (Brunet-Navarro *et al.* 2016; Forrester *et al.* 2021)  
662 influence the STL, although other studies found that it remained constant over time (Pretzsch  
663 *et al.* 2014). Importantly, the STL in mixed forests can also change when the relative proportion  
664 of species changes (Reyes-Hernandez *et al.* 2013), e.g., due to succession. However, the Swiss  
665 forest stands used in our analyses did not feature strong changes in species composition  
666 according to the Bray-Curtis dissimilarity index (see Table S1). Our analysis also considered

667 species effects by including the dominant species per plot as a random factor to control for  
668 species composition.

669 Further, our framework of evaluating changes in the STL in observations and  
670 simulations (with one PFT) avoids confounding effects to the largest extent possible. Our  
671 findings confirm that STLs are not static, simply reflecting edaphic factors, but are changing  
672 with changes in the environment. This is relevant for forest management, which often relies on  
673 the STL to inform wood harvesting and plantation management (Nagel *et al.* 2017).  
674 Importantly, the slope of the STL may also change as forest stands mature. Assuming a  
675 stationary self-thinning trajectory and a steeper slope as stands mature (constant final yield),  
676 would imply a downward shift of the fitted STL. Future work needs to investigate if shifts in  
677 these relationships also occur in primary forests along broader environmental gradients.  
678 Confronting modelled with empirical relationships will enable new insights into the links  
679 between forest dynamics and biomass.

## 680 **5. Conclusions**

681 Forest responses to global environmental changes are still unclear and difficult to study  
682 due to multiple interactions and anthropogenic disturbances. We focused on the mechanisms  
683 of forest stand dynamics and demography that determine the link between changes in tree  
684 growth and stand-level biomass stocks. We find that unmanaged closed-canopy forests in  
685 Switzerland have become denser for a given size over the past six decades, and we identify a  
686 positive relationship between growth and stand density. These observations are consistent with  
687 simulations showing that growth enhancement leads to increases in forest biomass and changes  
688 in the self-thinning relationship. However, relative changes in biomass are smaller than relative  
689 changes in growth, indicating an apparent reduction in carbon residence time. We show that  
690 this effect critically depends on the shape of the mortality parameterization. This data-  
691 supported mortality modelling yields new insights into the causes of currently observed  
692 terrestrial carbon sinks and future responses. Our study provides a better understanding of  
693 whether and how growth enhancements drive higher C storage - a key open question in carbon  
694 cycle research and highly relevant in the context of climate and Earth system changes.

## 695 **Acknowledgements**

696 We gratefully acknowledge the data providers and their long-term work to maintain and  
697 measure the different forest plots network. LM and BDS were funded by the Swiss National  
698 Science Foundation grant no. PCEFP2\_181115. We acknowledge WSL and ETH and their



699 scientists, technicians and data managers who designed, carried out and maintained the  
700 measurements on the permanent monitoring plots used in this study. Model calibration was  
701 based on data from the Swiss Long-term Forest Ecosystem Research (LWF). Data analyses  
702 and evaluations were based on data from (a) the Swiss National Forest Inventory (NFI), (b) the  
703 Experimental Forest Management (EFM), and (c) the Natural Forest Reserves (NFR). The  
704 Swiss Forest Reserve Research Network is supported by the Swiss Federal Office for the  
705 Environment (FOEN), WSL, and ETH Zurich. This work is a contribution to the  
706 LEMONTREE (Land Ecosystem Models based On New Theory, obseRvations and  
707 ExperimEnts) project, funded through the generosity of Eric and Wendy Schmidt by  
708 recommendation of the Schmidt Futures program. BDS acknowledges support from this  
709 project.

#### 710 **Authors' contributions**

711 BDS and LM conceived the study; BDS, EW and LM developed and implemented the model  
712 code; LM calibrated the model, ran the simulations, and conducted the empirical analyses; HB  
713 and DIF gave substantial inputs to the study design; DIF provided the EFM dataset; MLH and  
714 HB provided the NFR dataset; BR provided the NFI dataset and helped with the variable  
715 selection; VT provided the LWF data to calibrate the model. All authors contributed to  
716 manuscript development and gave final approval for publication.

#### 717 **Competing interests**

718 The authors declare no competing interests.

#### 719 **Code availability**

720 Code for the data analysis of this study is available at the GitHub repository DOI:  
721 10.5281/zenodo.7326085.

## 722 **References**

- 723 Ainsworth, E.A. & Long, S.P. (2005). What have we learned from 15 years of free-air CO<sub>2</sub> enrichment  
724 (FACE)? A meta-analytic review of the responses of photosynthesis, canopy properties and plant  
725 production to rising CO<sub>2</sub>. *New Phytol.*, 165, 351–371.
- 726 Anderegg, W.R.L., Ballantyne, A.P., Smith, W.K., Majkut, J., Rabin, S., Beaulieu, C., *et al.* (2015).  
727 Tropical nighttime warming as a dominant driver of variability in the terrestrial carbon sink. *Proc.*  
728 *Natl. Acad. Sci. U. S. A.*, 112, 15591–15596.
- 729 Anderegg, W.R.L., Trugman, A.T., Badgley, G., Anderson, C.M., Bartuska, A., Ciais, P., *et al.* (2020).  
730 Climate-driven risks to the climate mitigation potential of forests. *Science*.
- 731 Andresen, L.C., Müller, C., de Dato, G., Dukes, J.S., Emmett, B.A., Estiarte, M., *et al.* (2016). Shifting  
732 impacts of climate change. In: *Advances in Ecological Research*, Advances in ecological research.  
733 Elsevier, pp. 437–473.
- 734 Arora, V.K., Katavouta, A., Williams, R.G., Jones, C.D., Brovkin, V., Friedlingstein, P., *et al.* (2019).  
735 Carbon-concentration and carbon-climate feedbacks in CMIP6 models, and their comparison to  
736 CMIP5 models.
- 737 Bates, D., Mächler, M., Bolker, B. & Walker, S. (2015). Fitting Linear Mixed-Effects Models  
738 Using lme4. *Journal of Statistical Software*.
- 739 Bigler, C. & Veblen, T.T. (2009). Increased early growth rates decrease longevity of conifers in  
740 subalpine forests. *Oikos*, 118, 1130–1138.
- 741 Bi, H. (2004). Stochastic frontier analysis of a classic self-thinning experiment. *Austral Ecol.*, 29, 408–  
742 417.
- 743 Bradford, J.B., Birdsey, R.A., Joyce, L.A. & Ryan, M.G. (2008). Tree age, disturbance history, and  
744 carbon stocks and fluxes in subalpine Rocky Mountain forests. *Glob. Chang. Biol.*, 14, 2882–2897.
- 745 Bray, J.R. & Curtis, J.T. (1957). An ordination of the upland forest communities of southern Wisconsin.  
746 *Ecol. Monogr.*, 27, 325–349.
- 747 Brienen, R.J.W., Caldwell, L., Duchesne, L., Voelker, S., Barichivich, J., Baliva, M., *et al.* (2020).  
748 Forest carbon sink neutralized by pervasive growth-lifespan trade-offs. *Nat. Commun.*, 11, 4241.
- 749 Brienen, R.J.W., Phillips, O.L., Feldpausch, T.R., Gloor, E., Baker, T.R., Lloyd, J., *et al.* (2015). Long-  
750 term decline of the Amazon carbon sink. *Nature*, 519, 344–348.
- 751 Brunet-Navarro, P., Sterck, F.J., Vayreda, J., Martinez-Vilalta, J. & Mohren, G.M.J. (2016). Self-  
752 thinning in four pine species: an evaluation of potential climate impacts. *Ann. For. Sci.*, 73, 1025–  
753 1034.
- 754 Bugmann, H. & Bigler, C. (2011). Will the CO<sub>2</sub> fertilization effect in forests be offset by reduced tree  
755 longevity? *Oecologia*, 165, 533–544.
- 756 Bugmann, H. & Seidl, R. (2022). The evolution, complexity and diversity of models of long-term forest  
757 dynamics. *Journal of Ecology*.

- 758 Bugmann, H., Seidl, R., Hartig, F., Bohn, F., Brūna, J., Cailleret, M., *et al.* (2019). Tree mortality  
759 submodels drive simulated long-term forest dynamics: assessing 15 models from the stand to  
760 global scale. *Ecosphere*, 10, e02616.
- 761 Büntgen, U., Krusic, P.J., Piermattei, A., Coomes, D.A., Esper, J., Myglan, V.S., *et al.* (2019). Limited  
762 capacity of tree growth to mitigate the global greenhouse effect under predicted warming. *Nat.*  
763 *Commun.*, 10, 2171.
- 764 Burnham, K.P. & Anderson, D.R. (2003). *Model Selection and Multimodel Inference: A Practical*  
765 *Information-Theoretic Approach*. Springer Science & Business Media.
- 766 Cailleret, M., Jansen, S., Robert, E.M.R., Desoto, L., Aakala, T., Antos, J.A., *et al.* (2017). A synthesis  
767 of radial growth patterns preceding tree mortality. *Glob. Chang. Biol.*, 23, 1675–1690.
- 768 Campbell, J.E., Berry, J.A., Seibt, U., Smith, S.J., Montzka, S.A., Launois, T., *et al.* (2017). Large  
769 historical growth in global terrestrial gross primary production. *Nature*, 544, 84–87.
- 770 Charru, M., Seynave, I., Morneau, F., Rivoire, M. & Bontemps, J.-D. (2012). Significant differences  
771 and curvilinearity in the self-thinning relationships of 11 temperate tree species assessed from  
772 forest inventory data. *Ann. For. Sci.*, 69, 195–205.
- 773 Cole, C.T., Anderson, J.E., Lindroth, R.L. & Waller, D.M. (2009). Rising concentrations of atmospheric  
774 CO<sub>2</sub> have increased growth in natural stands of quaking aspen (*Populus tremuloides*). *Glob.*  
775 *Chang. Biol.*, 16, 2186–2197.
- 776 Collalti, A., Tjoelker, M.G., Hoch, G., Mäkelä, A., Guidolotti, G., Heskell, M., *et al.* (2020). Plant  
777 respiration: Controlled by photosynthesis or biomass? *Glob. Chang. Biol.*, 26, 1739–1753.
- 778 Davies-Barnard, T., Meyerholt, J., Zaehle, S., Friedlingstein, P., Brovkin, V., Fan, Y., *et al.* (2020).  
779 Nitrogen cycling in CMIP6 land surface models: Progress and limitations.
- 780 DeSoto, L., Cailleret, M., Sterck, F., Jansen, S., Kramer, K., Robert, E.M.R., *et al.* (2020). Low growth  
781 resilience to drought is related to future mortality risk in trees. *Nat. Commun.*, 11, 545.
- 782 Ellsworth, D.S., Anderson, I.C., Crous, K.Y., Cooke, J., Drake, J.E., Gherlenda, A.N., *et al.* (2017).  
783 Elevated CO<sub>2</sub> does not increase eucalypt forest productivity on a low-phosphorus soil. *Nat. Clim.*  
784 *Chang.*, 7, 279–282.
- 785 Enquist, B.J., Brown, J.H. & West, G.B. (1998). Allometric scaling of plant energetics and population  
786 density. *Nature*, 395, 163–165.
- 787 Enquist, B.J., West, G.B. & Brown, J.H. (2009). Extensions and evaluations of a general quantitative  
788 theory of forest structure and dynamics. *Proc. Natl. Acad. Sci. U. S. A.*, 106, 7046–7051.
- 789 Evans, M.R. (2012). Modelling ecological systems in a changing world. *Philos. Trans. R. Soc. Lond. B*  
790 *Biol. Sci.*, 367, 181–190.
- 791 Fang, J., Kato, T., Guo, Z., Yang, Y., Hu, H., Shen, H., *et al.* (2014). Evidence for environmentally  
792 enhanced forest growth. *Proc. Natl. Acad. Sci. U. S. A.*, 111, 9527–9532.
- 793 Farquhar, G.D., von Caemmerer, S. & Berry, J.A. (1980). A biochemical model of photosynthetic CO<sub>2</sub>

- 794 assimilation in leaves of C 3 species. *Planta*, 149, 78–90.
- 795 Fatichi, S., Pappas, C., Zscheischler, J. & Leuzinger, S. (2019). Modelling carbon sources and sinks in  
796 terrestrial vegetation. *New Phytol.*, 221, 652–668.
- 797 Fischer, C. & Traub, B. (Eds.). (2019). *Swiss national forest inventory - methods and models of the*  
798 *fourth assessment*. Managing Forest Ecosystems. 1st edn. Springer Nature, Cham, Switzerland.
- 799 Fisher, R.A., Koven, C.D., Anderegg, W.R.L., Christoffersen, B.O., Dietze, M.C., Farrior, C.E., *et al.*  
800 (2018). Vegetation demographics in Earth System Models: A review of progress and priorities.  
801 *Glob. Chang. Biol.*, 24, 35–54.
- 802 Fisher, R.A., Wieder, W.R., Sanderson, B.M., Koven, C.D., Oleson, K.W., Xu, C., *et al.* (2019).  
803 Parametric controls on vegetation responses to biogeochemical forcing in the CLM5. *J. Adv.*  
804 *Model. Earth Syst.*, 11, 2879–2895.
- 805 Fleischer, K., Rammig, A., De Kauwe, M.G., Walker, A.P., Domingues, T.F., Fuchslueger, L., *et al.*  
806 (2019). Amazon forest response to CO<sub>2</sub> fertilization dependent on plant phosphorus acquisition.  
807 *Nat. Geosci.*, 12, 736–741.
- 808 Forrester, D.I., Baker, T.G., Elms, S.R., Hobi, M.L., Ouyang, S., Wiedemann, J.C., *et al.* (2021). Self-  
809 thinning tree mortality models that account for vertical stand structure, species mixing and climate.  
810 *For. Ecol. Manage.*, 487, 118936.
- 811 Forrester, D.I., Tachauer, I.H.H., Annighofer, P., Barbeito, I., Pretzsch, H., Ruiz-Peinado, R., *et al.*  
812 (2017). Generalized biomass and leaf area allometric equations for European tree species  
813 incorporating stand structure, tree age and climate. *For. Ecol. Manage.*, 396, 160–175.
- 814 Frelich, L.E. (2002). *Cambridge studies in ecology: Forest dynamics and disturbance regimes: Studies*  
815 *from temperate evergreen-deciduous forests: Studies from temperate evergreen-deciduous forests*.  
816 Cambridge studies in ecology. Cambridge University Press, Cambridge, England.
- 817 Friedlingstein, P., Jones, M.W., O’Sullivan, M., Andrew, R.M., Bakker, D.C.E., Hauck, J., *et al.* (2021).  
818 Global Carbon Budget 2021.
- 819 Friend, A.D., Lucht, W., Rademacher, T.T., Keribin, R., Betts, R., Cadule, P., *et al.* (2014). Carbon  
820 residence time dominates uncertainty in terrestrial vegetation responses to future climate and  
821 atmospheric CO<sub>2</sub>. *Proc. Natl. Acad. Sci. U. S. A.*, 111, 3280–3285.
- 822 Gloor, M., Phillips, O.L., Lloyd, J.J., Lewis, S.L., Malhi, Y., Baker, T.R., *et al.* (2009). Does the  
823 disturbance hypothesis explain the biomass increase in basin-wide Amazon forest plot data?  
824 *Global Change Biology*.
- 825 Harris, I., Osborn, T.J., Jones, P. & Lister, D. (2020). Version 4 of the CRU TS monthly high-resolution  
826 gridded multivariate climate dataset. *Sci Data*, 7, 109.
- 827 Hobi, M., Stillhard, J., Projer, G., Mathys, A., Bugmann, H. & Brang, P. (2020). Forest reserves  
828 monitoring in Switzerland.
- 829 Hovenden, M.J., Leuzinger, S., Newton, P.C.D., Fletcher, A., Fatichi, S., Lüscher, A., *et al.* (2019).

- 830 Globally consistent influences of seasonal precipitation limit grassland biomass response to  
831 elevated CO<sub>2</sub>. *Nature Plants*.
- 832 Huang, J.-G., Bergeron, Y., Denneler, B., Berninger, F. & Tardif, J. (2007). Response of forest trees to  
833 increased atmospheric CO<sub>2</sub>. *CRC Crit. Rev. Plant Sci.*, 26, 265–283.
- 834 Hubau, W., Lewis, S.L., Phillips, O.L., Affum-Baffoe, K., Beekman, H., Cuní-Sanchez, A., *et al.*  
835 (2020). Asynchronous carbon sink saturation in African and Amazonian tropical forests. *Nature*,  
836 579, 80–87.
- 837 Huntzinger, D.N., Michalak, A.M., Schwalm, C., Ciais, P., King, A.W., Fang, Y., *et al.* (2017).  
838 Uncertainty in the response of terrestrial carbon sink to environmental drivers undermines carbon-  
839 climate feedback predictions. *Scientific Reports*.
- 840 Jiang, M., Medlyn, B.E., Drake, J.E., Duursma, R.A., Anderson, I.C., Barton, C.V.M., *et al.* (2020).  
841 The fate of carbon in a mature forest under carbon dioxide enrichment. *Nature*, 580, 227–231.
- 842 Keeling, R.F., Piper, S.C. & Heimann, M. (1996). Global and hemispheric CO<sub>2</sub> sinks deduced from  
843 changes in atmospheric O<sub>2</sub> concentration. *Nature*.
- 844 Körner, C. (2017). A matter of tree longevity. *Science*, 355, 130–131.
- 845 Kubiske, M.E., Woodall, C.W. & Kern, C.C. (2019). Increasing atmospheric CO<sub>2</sub> concentration stand  
846 development in trembling Aspen forests: Are outdated density management guidelines in need of  
847 revision for all species? *J. For.*, 117, 38–45.
- 848 Kuznetsova, A., Brockhoff, P.B. & Christensen, R.H.B. (2017). lmerTest Package: Tests in Linear  
849 Mixed Effects Models. *Journal of Statistical Software*.
- 850 Landsberg, J.J. & Waring, R.H. (1997). A generalised model of forest productivity using simplified  
851 concepts of radiation-use efficiency, carbon balance and partitioning. *For. Ecol. Manage.*, 95,  
852 209–228.
- 853 Leuning, R., Kelliher, F.M., Pury, D.G.G. & Schulze, E.-D. (1995). Leaf nitrogen, photosynthesis,  
854 conductance and transpiration: scaling from leaves to canopies. *Plant Cell Environ.*, 18, 1183–  
855 1200.
- 856 Lewis, S.L., Lopez-Gonzalez, G., Sonké, B., Affum-Baffoe, K., Baker, T.R., Ojo, L.O., *et al.* (2009).  
857 Increasing carbon storage in intact African tropical forests. *Nature*, 457, 1003–1006.
- 858 Loehle, C. (1988). Tree life history strategies: the role of defenses. *Can. J. For. Res.*, 18, 209–222.
- 859 Luo, Y., Su, B.O., Currie, W.S., Dukes, J.S., Finzi, A., Hartwig, U., *et al.* (2004). Progressive nitrogen  
860 limitation of ecosystem responses to rising atmospheric carbon dioxide. *Bioscience*, 54, 731.
- 861 Luo, Y. & Weng, E. (2011). Dynamic disequilibrium of the terrestrial carbon cycle under global change.  
862 *Trends Ecol. Evol.*, 26, 96–104.
- 863 Mäkelä, A., Landsberg, J., Ek, A.R., Burk, T.E., Ter-Mikaelian, M., Agren, G.I., *et al.* (2000). Process-  
864 based models for forest ecosystem management: current state of the art and challenges for practical  
865 implementation. *Tree Physiol.*, 20, 289–298.

- 866 Maschler, J., Bialic-Murphy, L., Wan, J., Andresen, L.C., Zohner, C.M., Reich, P.B., *et al.* (2022).  
867 Links across ecological scales: Plant biomass responses to elevated CO. *Glob. Chang. Biol.*
- 868 McDowell, N., Allen, C.D., Anderson-Teixeira, K., Brando, P., Brienen, R., Chambers, J., *et al.* (2018).  
869 Drivers and mechanisms of tree mortality in moist tropical forests. *New Phytol.*, 219, 851–869.
- 870 McDowell, N.G., Allen, C.D., Anderson-Teixeira, K., Aukema, B.H., Bond-Lamberty, B., Chini, L., *et*  
871 *al.* (2020). Pervasive shifts in forest dynamics in a changing world. *Science*, 368.
- 872 McDowell, N.G., Beerling, D.J., Breshears, D.D., Fisher, R.A., Raffa, K.F. & Stitt, M. (2011). The  
873 interdependence of mechanisms underlying climate-driven vegetation mortality. *Trends Ecol.*  
874 *Evol.*, 26, 523–532.
- 875 McDowell, N.G., Sapes, G., Pivovarov, A., Adams, H.D., Allen, C.D., Anderegg, W.R.L., *et al.* (2022).  
876 Mechanisms of woody-plant mortality under rising drought, CO<sub>2</sub> and vapour pressure deficit. *Nat*  
877 *Rev Earth Environ.*
- 878 McMahan, S.M., Parker, G.G. & Miller, D.R. (2010). Evidence for a recent increase in forest growth.  
879 *Proc. Natl. Acad. Sci. U. S. A.*, 107, 3611–3615.
- 880 Midgley, J.J. (2001). Do mixed-species mixed-size indigenous forests also follow the self-thinning line?  
881 *Trends in Ecology & Evolution.*
- 882 Morris, E.C. & Charles Morris, E. (2003). How does fertility of the substrate affect intraspecific  
883 competition? Evidence and synthesis from self-thinning. *Ecological Research.*
- 884 Mrad, A., Manzoni, S., Oren, R., Vico, G., Lindh, M. & Katul, G. (2020). Recovering the metabolic,  
885 self-thinning, and constant final yield rules in mono-specific stands. *Front. For. Glob. Chang.*, 3.
- 886 Myneni, R., Knyazikhin, Y. & Park, T. (2015). MCD15A3H MODIS/Terra+Aqua Leaf Area  
887 Index/FPAR 4-day L4 Global 500m SIN Grid V006.
- 888 Nagel, L.M., Palik, B.J., Battaglia, M.A., D’Amato, A.W., Guldin, J.M., Swanston, C.W., *et al.* (2017).  
889 Adaptive silviculture for climate change: A national experiment in manager-scientist partnerships  
890 to apply an adaptation framework. *J. For.*, 115, 167–178.
- 891 Nakagawa, S. & Schielzeth, H. (2013). A general and simple method for obtaining R<sup>2</sup> from generalized  
892 linear mixed-effects models. *Methods Ecol. Evol.*, 4, 133–142.
- 893 Needham, J.F., Chambers, J., Fisher, R., Knox, R. & Koven, C.D. (2020). Forest responses to simulated  
894 elevated CO under alternate hypotheses of size- and age-dependent mortality. *Glob. Chang. Biol.*,  
895 26, 5734–5753.
- 896 Norby, R.J., Delucia, E.H., Gielen, B., Calfapietra, C., Giardina, C.P., King, J.S., *et al.* (2005). Forest  
897 response to elevated CO<sub>2</sub> is conserved across a broad range of productivity. *Proc. Natl. Acad. Sci.*  
898 *U. S. A.*, 102, 18052–18056.
- 899 Norby, R.J. & Zak, D.R. (2011). Ecological lessons from free-air CO<sub>2</sub> enrichment (FACE) experiments.  
900 *Annu. Rev. Ecol. Evol. Syst.*, 42, 181–203.
- 901 Pan, Y., Birdsey, R.A., Fang, J., Houghton, R., Kauppi, P.E., Kurz, W.A., *et al.* (2011). A large and

- 902 persistent carbon sink in the world's forests. *Science*, 333, 988–993.
- 903 Park Williams, A., Allen, C.D., Macalady, A.K., Griffin, D., Woodhouse, C.A., Meko, D.M., *et al.*  
904 (2013). Temperature as a potent driver of regional forest drought stress and tree mortality. *Nat.*  
905 *Clim. Chang.*, 3, 292–297.
- 906 Pastorello, G., Trotta, C., Canfora, E., Chu, H., Christianson, D., Cheah, Y.-W., *et al.* (2020). The  
907 FLUXNET2015 dataset and the ONEFlux processing pipeline for eddy covariance data. *Sci Data*,  
908 7, 225.
- 909 Phillips, O.L., Aragão, L.E.O.C., Lewis, S.L., Fisher, J.B., Lloyd, J., López-González, G., *et al.* (2009).  
910 Drought sensitivity of the Amazon rainforest. *Science*, 323, 1344–1347.
- 911 Piao, S., Liu, Q., Chen, A., Janssens, I.A., Fu, Y., Dai, J., *et al.* (2019). Plant phenology and global  
912 climate change: Current progresses and challenges. *Glob. Chang. Biol.*, 25, 1922–1940.
- 913 Portier, J., Wunder, J., Stadelmann, G., Zell, J., Abegg, M., Thürig, E., *et al.* (2021). “Latent reserves”:  
914 A hidden treasure in National Forest Inventories. *J. Ecol.*, 109, 369–383.
- 915 Pretzsch, H. (2006). Species-specific allometric scaling under self-thinning: evidence from long-term  
916 plots in forest stands. *Oecologia*, 146, 572–583.
- 917 Pretzsch, H., Biber, P., Schütze, G., Uhl, E. & Rötzer, T. (2014). Forest stand growth dynamics in  
918 Central Europe have accelerated since 1870. *Nat. Commun.*, 5, 4967.
- 919 Pugh, T.A.M., Rademacher, T., Shafer, S.L., Steinkamp, J., Barichivich, J., Beckage, B., *et al.* (2020).  
920 Understanding the uncertainty in global forest carbon turnover. *Biogeosciences*, 17, 3961–3989.
- 921 Purves, D.W., Lichstein, J.W., Strigul, N. & Pacala, S.W. (2008). Predicting and understanding forest  
922 dynamics using a simple tractable model. *Proc. Natl. Acad. Sci. U. S. A.*, 105, 17018–17022.
- 923 Randerson, J.T., Thompson, M.V., Conway, T.J., Fung, I.Y. & Field, C.B. (1997). The contribution of  
924 terrestrial sources and sinks to trends in the seasonal cycle of atmospheric carbon dioxide. *Global*  
925 *Biogeochem. Cycles*, 11, 535–560.
- 926 Reineke, L.H. (1933). *Perfecting a Stand-density Index for Even-aged Forests*.
- 927 Reyes-Hernandez, V., Comeau, P.G. & Bokalo, M. (2013). Static and dynamic maximum size–density  
928 relationships for mixed trembling aspen and white spruce stands in western Canada. *For. Ecol.*  
929 *Manage.*, 289, 300–311.
- 930 Rivoire, M. & Le Moguedec, G. (2012). A generalized self-thinning relationship for multi-species and  
931 mixed-size forests. *Annals of Forest Science*.
- 932 Schwalm, C.R., Anderegg, W.R.L., Michalak, A.M., Fisher, J.B., Biondi, F., Koch, G., *et al.* (2017).  
933 Global patterns of drought recovery. *Nature*.
- 934 Senf, C., Pflugmacher, D., Zhiqiang, Y., Sebal, J., Knorn, J., Neumann, M., *et al.* (2018). Canopy  
935 mortality has doubled in Europe's temperate forests over the last three decades. *Nat. Commun.*, 9,  
936 4978.
- 937 Sitch, S., Smith, B., Prentice, I.C., Arneth, A., Bondeau, A., Cramer, W., *et al.* (2003). Evaluation of

- 938 ecosystem dynamics, plant geography and terrestrial carbon cycling in the LPJ dynamic global  
939 vegetation model. *Glob. Chang. Biol.*, 9, 161–185.
- 940 Smith, A.R., Lukac, M., Bambrick, M., Miglietta, F. & Godbold, D.L. (2013). Tree species diversity  
941 interacts with elevated CO<sub>2</sub> to induce a greater root system response. *Glob. Chang. Biol.*, 19, 217–  
942 228.
- 943 Sommerfeld, A., Senf, C., Buma, B., D’Amato, A.W., Després, T., Díaz-Hormazábal, I., *et al.* (2018).  
944 Patterns and drivers of recent disturbances across the temperate forest biome. *Nat. Commun.*, 9,  
945 4355.
- 946 Stocker, B. (2020a). *stineb/ingestr: Dummy release for Zenodo*. Zenodo.
- 947 Stocker, B. (2020b). *rsofun*. Zenodo.
- 948 Terrer, C., Jackson, R.B., Prentice, I.C., Keenan, T.F., Kaiser, C., Vicca, S., *et al.* (2019). Nitrogen and  
949 phosphorus constrain the CO<sub>2</sub> fertilization of global plant biomass. *Nat. Clim. Chang.*, 9, 684–  
950 689.
- 951 Thimonier, A., Graf Pannatier, E., Schmitt, M., Waldner, P., Walthert, L., Schleppei, P., *et al.* (2010).  
952 Does exceeding the critical loads for nitrogen alter nitrate leaching, the nutrient status of trees and  
953 their crown condition at Swiss Long-term Forest Ecosystem Research (LWF) sites? *Eur. J. For.*  
954 *Res.*, 129, 443–461.
- 955 Walker, A.P., De Kauwe, M.G., Bastos, A., Belmecheri, S., Georgiou, K., Keeling, R.F., *et al.* (2021).  
956 Integrating the evidence for a terrestrial carbon sink caused by increasing atmospheric CO<sub>2</sub>. *New*  
957 *Phytol.*, 229, 2413–2445.
- 958 Wang, J.A., Baccini, A., Farina, M., Randerson, J.T. & Friedl, M.A. (2021). Disturbance suppresses  
959 the aboveground carbon sink in North American boreal forests. *Nat. Clim. Chang.*, 11, 435–441.
- 960 Weiskittel, A.R., Temesgen, H., Wilson, D.S. & Maguire, D.A. (2008). Sources of within- and between-  
961 stand variability in specific leaf area of three ecologically distinct conifer species. *Annals of Forest*  
962 *Science*.
- 963 Weng, E., Dybzinski, R., Farrior, C.E. & Pacala, S.W. (2019). Competition alters predicted forest  
964 carbon cycle responses to nitrogen availability and elevated CO<sub>2</sub>: simulations using an explicitly  
965 competitive, game-theoretic vegetation demographic model.
- 966 Weng, E., Farrior, C.E., Dybzinski, R. & Pacala, S.W. (2017). Predicting vegetation type through  
967 physiological and environmental interactions with leaf traits: evergreen and deciduous forests in  
968 an earth system modeling framework. *Glob. Chang. Biol.*, 23, 2482–2498.
- 969 Weng, E.S., Malyshev, S., Lichstein, J.W., Farrior, C.E., Dybzinski, R., Zhang, T., *et al.* (2015). Scaling  
970 from individual trees to forests in an Earth system modeling framework using a mathematically  
971 tractable model of height-structured competition. *Biogeosciences*, 12, 2655–2694.
- 972 West, G.B., Brown, J.H. & Enquist, B.J. (1997). A general model for the origin of allometric scaling  
973 laws in biology. *Science*, 276, 122–126.



- 974 Westoby, M. (1984). The self-thinning rule. In: *Advances in Ecological Research*, Advances in  
975 ecological research. Elsevier, pp. 167–225.
- 976 Wood, S.N. (2017). *Generalized Additive Models: An Introduction with R, Second Edition*. CRC Press.
- 977 Wright, S.J., Kitajima, K., Kraft, N.J.B., Reich, P.B., Wright, I.J., Bunker, D.E., *et al.* (2010).  
978 Functional traits and the growth-mortality trade-off in tropical trees. *Ecology*, 91, 3664–3674.
- 979 Wu, C., Hember, R.A., Chen, J.M., Kurz, W.A., Price, D.T., Boisvenue, C., *et al.* (2014). Accelerating  
980 forest growth enhancement due to climate and atmospheric changes in British Columbia, Canada  
981 over 1956-2001. *Sci. Rep.*, 4, 4461.
- 982 Xia, J., Luo, Y., Wang, Y.-P. & Hararuk, O. (2013). Traceable components of terrestrial carbon storage  
983 capacity in biogeochemical models. *Glob. Chang. Biol.*, 19, 2104–2116.
- 984 Xiang, Y., Gubian, S., Suomela, B. & Hoeng, J. (2013). Generalized simulated annealing for global  
985 optimization: The GenSA package. *R J.*, 5, 13.
- 986 Yoda K Kira T Ogawa H Hozumi K. (1963). Self-thinning in overcrowded pure stands under cultivated  
987 and natural conditions. *J. Biol.*, 14, 107–129.
- 988 Yoda, K., Kira, T., Ogawa, H., & Hozumi, K. (1963). Self-Thinning in Overcrowded Pure Stands under  
989 Cultivated and Natural Conditions. *J. Biol.*, 14, 107–129.
- 990 Yuan, W., Zheng, Y., Piao, S., Ciais, P., Lombardozzi, D., Wang, Y., *et al.* (2019). Increased  
991 atmospheric vapor pressure deficit reduces global vegetation growth. *Sci Adv*, 5, eaax1396.
- 992 Yu, K., Smith, W.K., Trugman, A.T., Condit, R., Hubbell, S.P., Sardans, J., *et al.* (2019). Pervasive  
993 decreases in living vegetation carbon turnover time across forest climate zones. *Proc. Natl. Acad.*  
994 *Sci. U. S. A.*, 116, 24662–24667.
- 995 Zeide, B. (1993). Primary unit of the tree crown. *Ecology*, 74, 1598–1602.
- 996 Zuur, A.F. (2009). *Mixed effects models and extensions in ecology with R*. Statistics for Biology and  
997 Health. Springer, New York, NY.
